# Supplementary material
Source: publisher site journal article supplement (https://www.spandidos-publications.com/4598/downloadSupplementary)
Supplement: Supplementary file 1 [file downloadSupplementary]

## Sheet: Sheet 1
Table SIII. Exosome quality inspection report
Samples	Sizes	30-150 nm intensity（%)	Particles/ml	OD560 nm	Protein concentration （μg/μL)	Total protein（μg)
Pre	68.28	94.83	21200000000	0.41	20.57	781.81
Post	77.47	91.67	22200000000	0.7864	47.56	1807.11
